# Supplementary material for: Reliability and concurrent validity of the iPhone® Compass application to measure thoracic rotation range of motion (ROM) in healthy participants
Source: PeerJ. 2018 Mar 8;6:e4431. doi: 10.7717/peerj.4431 (PMC5845564; doi:10.7717/peerj.4431)
Supplement: Data S1 [file peerj-06-4431-s001.xlsx]

## Sheet: Sheet1
ParticipantnNumber	Age	Height	Weight	Gender	M1_R1_gon_left	M1_R1_gon_right	M1_R1_com_left	M1_R1_com_right	M2_R1_gon_left	M2_R1_gon_right	M2_R1_com_left	M2_R1_com_right	M3_R1_gon_left	M3_R1_gon_right	M3_R1_com_left	M3_R1_com_right	M1_R2_gon_left	M1_R2_gon_right	M1_R2_com_left	M1_R2_com_right	M2_R2_gon_left	M2_R2_gon_right	M2_R2_com_left	M2_R2_com_right	M3_R2_gon_left	M3_R2_gon_right	M3_R2_com_left	M3_R2_com_right	R1_ave_gon_left	R2_ave_gon_left	R1_ave_com_left	R2_ave_com_left	R1_ave_gon_right	R2_ave_gon_right	R1_ave_com_right	R2_ave_com_right
1	35	173	80	1	71	70	65	63	74	55	63	62	71	61	63	57	53	55	65	56	60	53	77	59	56	52	74	56	72	56.33	63.67	72	62	53.33	60.67	57
2	24	156	70	2	74	62	58	61	71	64	59	58	71	69	57	60	40	45	50	49	42	50	50	57	50	42	51	53	72	44	58	50.33	65	45.67	59.67	53
3	23	160	55	2	74	71	67	64	71	70	68	62	71	72	65	69	60	76	60	63	60	76	68	62	68	73	68	63	72	62.67	66.67	65.33	71	75	65	62.67
4	23	188	92	1	81	72	80	67	82	79	81	65	81	79	84	66	74	75	81	69	75	78	81	70	70	80	83	70	81.33	73	81.67	81.67	76.67	77.67	66	69.67
5	27	180	90	1	69	65	71	67	65	63	72	68	69	63	68	66	58	60	62	65	63	66	58	48	57	69	52	68	67.67	59.33	70.33	57.33	63.67	65	67	60.33
6	36	175	74	1	74	72	84	84	80	75	81	88	78	80	80	86	68	62	75	80	70	79	74	82	81	72	78	83	77.33	73	81.67	75.67	75.67	71	86	81.67
7	25	165	59	2	92	84	85	85	95	83	86	83	95	83	85	81	75	73	87	84	75	85	91	82	75	78	88	80	94	75	85.33	88.67	83.33	78.67	83	82
8	24	165	64	2	75	69	64	54	62	73	65	60	63	63	68	65	50	58	64	49	66	55	62	60	62	56	68	60	66.67	59.33	65.67	64.67	68.33	56.33	59.67	56.33
9	24	185	72	2	39	40	34	38	41	39	33	39	40	35	35	43	32	26	38	34	43	28	43	42	46	31	39	41	40	40.33	34	40	38	28.33	40	39
10	25	170	73	1	47	52	49	50	47	50	53	50	51	44	55	49	44	37	44	45	40	39	43	50	40	42	42	54	48.33	41.33	52.33	43	48.67	39.33	49.67	49.67
11	26	179	78	1	54	61	46	67	59	62	49	68	55	60	50	71	45	60	45	54	45	58	52	56	41	62	53	56	56	43.67	48.33	50	61	60	68.67	55.33
12	38	160	60	2	74	73	79	72	70	74	71	71	71	76	76	75	67	80	70	86	70	88	66	87	72	78	68	88	71.67	69.67	75.33	68	74.33	82	72.67	87
13	24	178	69	2	79	82	59	61	80	83	60	65	80	80	66	61	52	66	55	68	65	62	56	69	54	63	52	70	79.67	57	61.67	54.33	81.67	63.67	62.33	69
14	24	175	75	1	61	80	54	73	62	75	49	77	64	81	57	73	77	79	63	65	74	79	69	61	88	70	72	60	62.33	79.67	53.33	68	78.67	76	74.33	62
15	25	170	59	2	52	45	42	46	48	51	46	47	55	55	43	49	48	60	57	52	48	49	57	55	48	48	58	49	51.67	48	43.67	57.33	50.33	52.33	47.33	52
16	25	165	70	1	79	82	70	74	81	79	79	77	80	84	70	79	70	76	74	62	75	72	78	74	72	70	77	73	80	72.33	73	76.33	81.67	72.67	76.67	69.67
17	23	175	79	1	65	62	53	51	62	61	58	55	62	66	53	57	58	70	63	53	60	71	65	56	65	68	60	60	63	61	54.67	62.67	63	69.67	54.33	56.33
18	26	152	65	2	61	68	56	60	64	65	51	64	66	68	51	65	55	70	52	48	57	74	56	56	54	67	58	62	63.67	55.33	52.67	55.33	67	70.33	63	55.33
19	32	178	77	1	51	51	53	57	51	55	52	57	51	59	50	65	48	46	58	50	58	42	62	46	60	43	63	47	51	55.33	51.67	61	55	43.67	59.67	47.67
20	25	170	62	2	80	70	74	65	78	69	80	61	78	70	75	68	67	63	68	64	67	62	67	63	74	66	72	70	78.67	69.33	76.33	69	69.67	63.67	64.67	65.67
21	37	174	68	2	61	55	57	43	61	53	55	43	62	57	60	42	62	60	69	60	65	58	66	63	70	65	73	59	61.33	65.67	57.33	69.33	55	61	42.67	60.67
22	60	164	60	2	73	70	65	57	76	69	66	56	71	75	68	53	70	78	59	63	75	70	60	61	76	70	55	64	73.33	73.67	66.33	58	71.33	72.67	55.33	62.67
23	36	168	57	2	61	51	50	51	57	53	51	55	55	57	50	53	53	53	45	55	54	53	47	55	52	48	47	53	57.67	53	50.33	46.33	53.67	51.33	53	54.33
24	23	160	50	2	65	55	54	56	65	56	52	56	63	58	50	57	53	46	56	41	56	49	50	47	55	49	51	41	64.33	54.67	52	52.33	56.33	48	56.33	43
25	25	170	70	2	78	78	55	64	78	78	59	64	78	79	61	65	65	58	55	57	55	56	58	58	65	58	55	64	78	61.67	58.33	56	78.33	57.33	64.33	59.67
26	25	168	63	2	61	59	52	41	61	58	53	40	61	61	50	38	56	56	51	45	58	43	43	36	54	45	45	40	61	56	51.67	46.33	59.33	48	39.67	40.33
27	43	170	59	2	61	56	52	55	61	58	54	55	59	59	53	51	60	45	57	48	61	49	55	47	66	48	59	48	60.33	62.33	53	57	57.67	47.33	53.67	47.67
28	52	175	65	2	61	61	49	62	61	63	52	75	61	61	54	76	51	55	50	60	56	54	52	65	57	60	54	66	61	54.67	51.67	52	61.67	56.33	71	63.67
29	25	157	53	2	68	62	57	53	70	63	57	56	71	62	56	61	66	55	60	66	71	65	56	67	66	57	56	67	69.67	67.67	56.67	57.33	62.33	59	56.67	66.67
30	34	168	68	2	70	61	64	46	74	60	63	50	74	59	61	51	58	56	49	48	51	55	52	45	60	55	54	46	72.67	56.33	62.67	51.67	60	55.33	49	46.33
Key
M	Represents the measure (i.e. M1 equals Measure 1)
R	Represent the rater (i.e. R1 equals rater 1)
gon	Represents goniometer
Com	Represents the compass app
ave	Represents the average of the three measures
M1_R1_gon_left	This represents measure 1 with rater 1 using the goniometer and rotating to the left
